# Supplementary material for: At-C-RNA database, a one-stop source for information on circRNAs inArabidopsis thalianain a unified format
Source: Oxford University Press journal article supplement (doi:10.1093/database/baab074), 2021-01-01
Supplement: baab074_supp.zip [file baab074_supp.zip]

This document certifies that the manuscript

At-C-RNA database, a one-stop source of information on circRNAs in *Arabidopsis thaliana* in a unified format

prepared by the authors

Katarzyna Nowis, Paulina Jackowiak, Marek Figlerowicz, Anna Philips

was edited for proper English language, grammar, punctuation, spelling, and overall style by one or more of the highly qualified native English speaking editors at SNAS.

This certificate was issued on **December 16, 2020** and may be verified on the [SNAS website](#) using the verification code **148F-C01B-54F9-87D1-D731**.

Neither the research content nor the authors' intentions were altered in any way during the editing process. Documents receiving this certification should be English-ready for publication; however, the author has the ability to accept or reject our suggestions and changes. To verify the final

SNAS edited version, please visit our verification page at [secure.authorservices.springernature.com/certificate/verify](https://secure.authorservices.springernature.com/certificate/verify).

If you have any questions or concerns about this edited document, please contact SNAS at [support@as.springernature.com](mailto:support@as.springernature.com).
